# Supplementary material
Source: publisher figshare collection journal article supplement (https://karger.figshare.com/articles/dataset/_/7546706)
Supplement: Supplementary file 1 [file 1]

**Legends for supplemental files:**

**Echocardiography-video-1:** 4-chamber view of echocardiography video including color Doppler mode, highlighting intracardiac Wilms tumor extension and dynamic movement of the tricuspid valve.

**Echocardiography-video-2:** Subcostal transhepatic longitudinal view of echocardiography video including color Doppler mode, highlighting Wilms tumor extension within the liver and protrusion into the heart.
